# Supplementary material for: Assessment of Short- and Long-Term Mortality Displacement in Heat-Related Deaths in Brisbane, Australia, 1996–2004
Source: PubMed Central journal article supplement (PMC4529002; doi:10.1289/ehp.1307606), 2015-03-20
Supplement: ehp.1307606.s001.acco.pdf [file ehp.1307606.s001.acco.pdf]

**Note to Readers:** *EHP* strives to ensure that all journal content is accessible to all readers.

However, some figures and Supplemental Material published in *EHP* articles may not conform to 508 standards due to the complexity of the information being presented. If you need assistance accessing journal content, please contact [ehp508@niehs.nih.gov](mailto:ehp508@niehs.nih.gov). Our staff will work with you to assess and meet your accessibility needs within 3 working days.

## **Supplemental Material**

### **Assessment of Short- and Long-Term Mortality Displacement in Heat-Related Deaths in Brisbane, Australia, 1996–2004**

Zhen Qiao, Yuming Guo, Weiwei Yu, and Shilu Tong

#### **Table of Contents**

**Table S1.** Yearly residuals for each winter and overall mean residual for all winters in the whole study period for non-accidental mortality (all ages combined). Residuals are from the model which regressed the time-series of daily counts of deaths against trend. Provided as an example to clarify how the H/L classification relates to the daily number of deaths.

**Figure S1.** The estimated relative risk of dying on a day with 29°C compared with a day with 28°C (threshold temperature) over 21 days of lag for the stratum of “H” summer (H) and for “L” summer (L) on each age and mortality categories.

**Table S2.** Estimated effects associated with 1°C increase in summer temperature (mean temperature, lag 0–1) by age and diseases in Brisbane, Australia, 1996–2004.

**Table S1.** Yearly residuals for each winter and overall mean residual for all winters in the whole study period for non-accidental mortality (all ages combined). Residuals are from the model which regressed the time-series of daily counts of deaths against trend. Provided as an example to clarify how the H/L classification relates to the daily number of deaths.

| <b>Year (winter)</b> | <b>Average daily number of deaths (winter)</b> | <b>Yearly residuals for each winter (<math>\mu_i</math>)</b> | <b>Overall mean residual for all winters (<math>\mu_w</math>)</b> | <b>Classification of the following summer</b> |
|----------------------|------------------------------------------------|--------------------------------------------------------------|-------------------------------------------------------------------|-----------------------------------------------|
| 1996                 | 21.5                                           | 0.071338050                                                  | -0.04318664                                                       | H                                             |
| 1997                 | 19.9                                           | -0.048803101                                                 | -0.04318664                                                       | L                                             |
| 1998                 | 19.1                                           | 0.008873423                                                  | -0.04318664                                                       | H                                             |
| 1999                 | 20.1                                           | -0.109256300                                                 | -0.04318664                                                       | L                                             |
| 2000                 | 17.9                                           | -0.172940006                                                 | -0.04318664                                                       | L                                             |
| 2001                 | 18.2                                           | -0.080683982                                                 | -0.04318664                                                       | L                                             |
| 2002                 | 19.3                                           | 0.010870957                                                  | -0.04318664                                                       | H                                             |
| 2003                 | 18.2                                           | 0.010710604                                                  | -0.04318664                                                       | H                                             |
| 2004                 | 17.8                                           | -0.078789381                                                 | -0.04318664                                                       | L                                             |

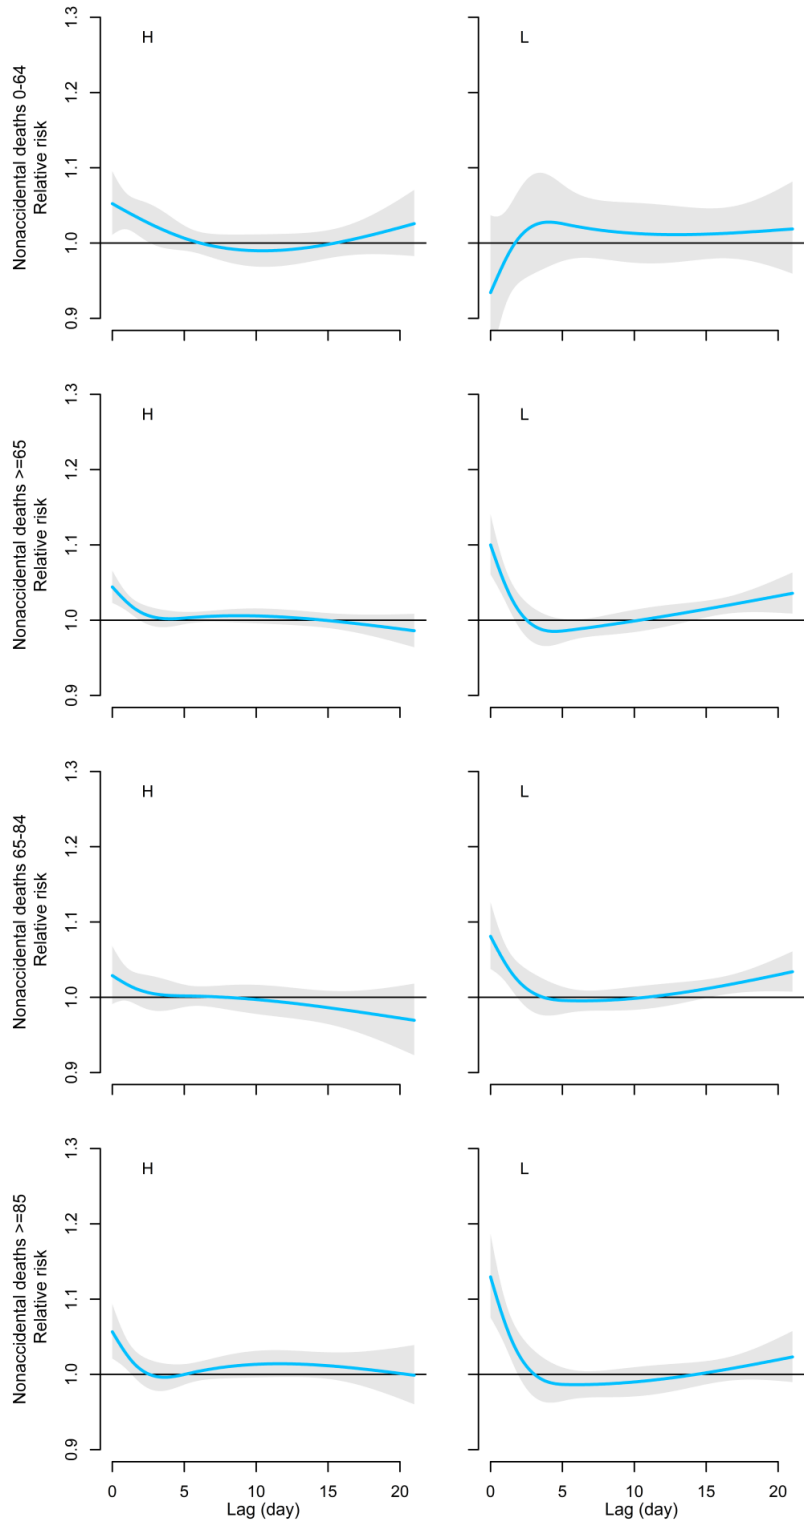

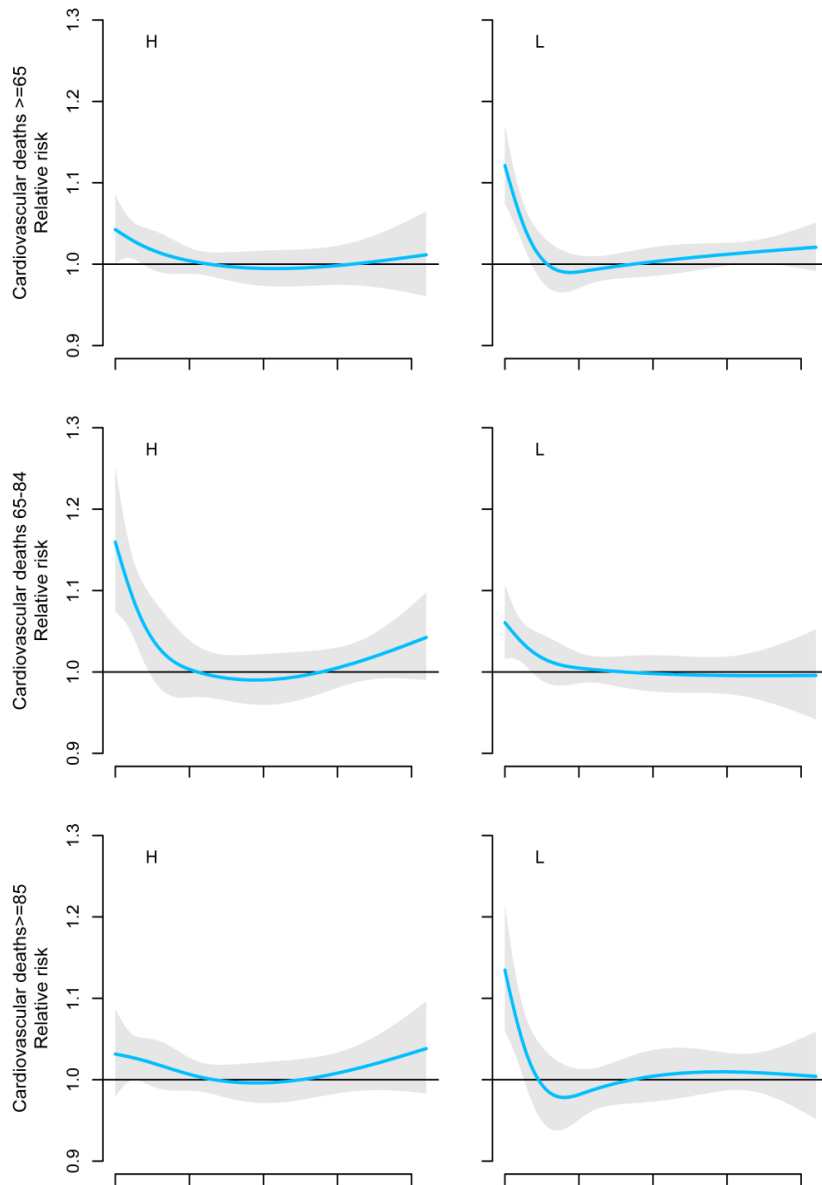

**Figure S1.** The estimated relative risk of dying on a day with 29°C compared with a day with 28°C (threshold temperature) over 21 days of lag for the stratum of “H” summer (H) and for “L” summer (L) on each age and mortality categories.

**Table S2.** Estimated effects associated with 1°C increase in summer temperature (mean temperature, lag 0–1) by age and diseases in Brisbane, Australia, 1996–2004.

| Disease categories | Age groups              | Percentage increase in mortality <sup>a</sup> |                         |                         | P <sup>d</sup> |
|--------------------|-------------------------|-----------------------------------------------|-------------------------|-------------------------|----------------|
|                    |                         | All summers                                   | “H” summer <sup>b</sup> | “L” summer <sup>c</sup> |                |
| Nonaccidental      | All ages                | 3.88 (2.85, 4.93)                             | 3.64 (2.23, 5.06)       | 4.01 (2.47, 5.57)       | 0.710          |
|                    | 0–64 years              | 3.37 (0.92, 5.87)                             | 4.94 (1.94, 8.02)       | 0.72 (-3.63, 5.27)      | 0.070          |
|                    | ≥ 65 years              | 4.00 (2.83, 5.18)                             | 3.13 (1.63, 4.65)       | 5.41 (3.49, 7.36)       | 0.051          |
|                    | 65–84 years             | 3.39 (1.84, 4.97)                             | 2.20 (-0.31, 4.76)      | 4.07 (2.07, 6.10)       | 0.298          |
|                    | ≥ 85 years              | 4.91 (3.05, 6.81)                             | 4.24 (1.49, 7.06)       | 5.95 (3.31, 8.65)       | 0.454          |
| Cardiovascular     | all ages                | 4.09 (2.40, 5.81)                             | 2.86 (0.52, 5.25)       | 5.20 (2.72, 7.74)       | 0.098          |
|                    | 0–64 years <sup>e</sup> | —                                             | —                       | —                       | —              |
|                    | ≥ 65 years              | 4.50 (2.71, 6.32)                             | 2.99 (0.24, 5.814)      | 5.55 (3.15, 8.01)       | 0.223          |
|                    | 65–84 years             | 3.92 (1.43, 6.47)                             | 3.77 (0.00, 7.68)       | 3.89 (0.48, 7.42)       | 0.861          |
|                    | ≥ 85 years              | 5.15 (2.54, 7.84)                             | 3.19 (-0.56, 7.09)      | 7.11 (3.41, 10.94)      | 0.120          |
| Respiratory        | all ages                | 0.00 (-3.81, 3.96)                            | 2.64 (-1.10, 6.51)      | 0.00 (-6.56, 7.02)      | 0.102          |

<sup>a</sup>Percentage increase in daily mortality with a 1°C temperature (mean temperature, lag 0–1) increase. <sup>b</sup>“H” summer stratum, summers with high previous winter mortality. <sup>c</sup>“L” summer stratum, summers with low previous winter mortality. <sup>d</sup>p -Value for the interaction term between previous winter mortality levels and summer temperature variable. <sup>e</sup>Not estimated due to insufficient death counts.
